# Supplementary material
Source: publisher site journal article supplement (https://www.dovepress.com/article/278150)
Supplement: Supplementary file 1 [file get_supplementary_file.php]

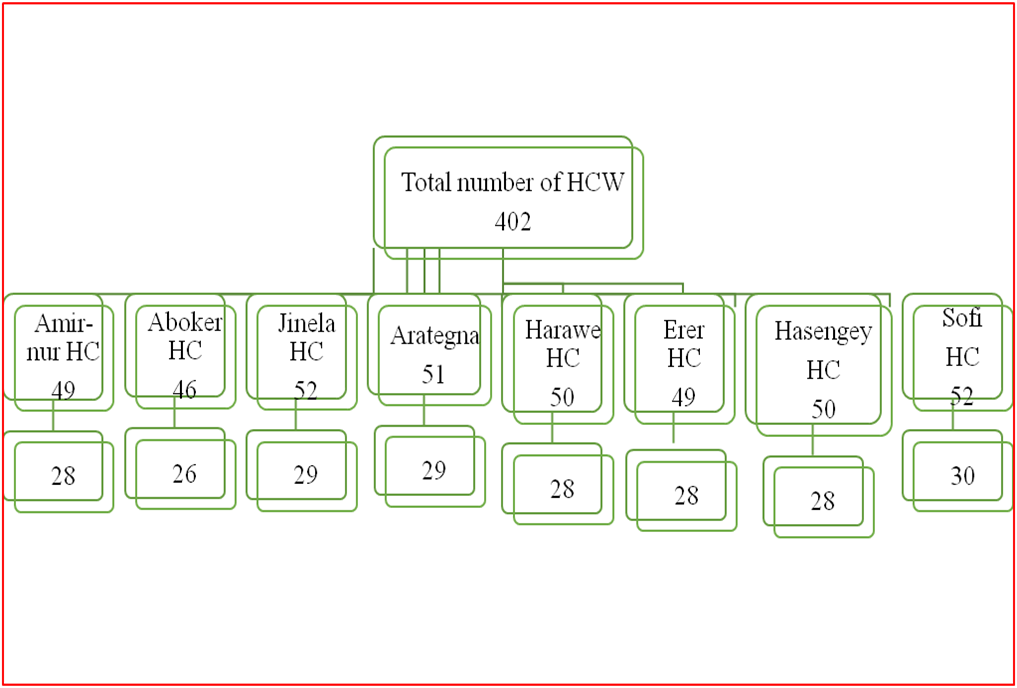


Figure (Supplementary): Sampling of health professionals from the health centers in the Harari region, Eastern Ethiopia, March-April 2019
